# Supplementary material for: Controlling selectivities in CO2 reduction through mechanistic understanding
Source: PubMed Central journal article supplement (PMC5594010; doi:10.1038/s41467-017-00558-9), 2017-09-11
Supplement: 41467_2017_558_MOESM1_ESM.pdf [file 41467_2017_558_MOESM1_ESM.pdf]

### **Description of Supplementary Files**

File Name: Supplementary Information

Description: Supplementary Figures and Supplementary Table

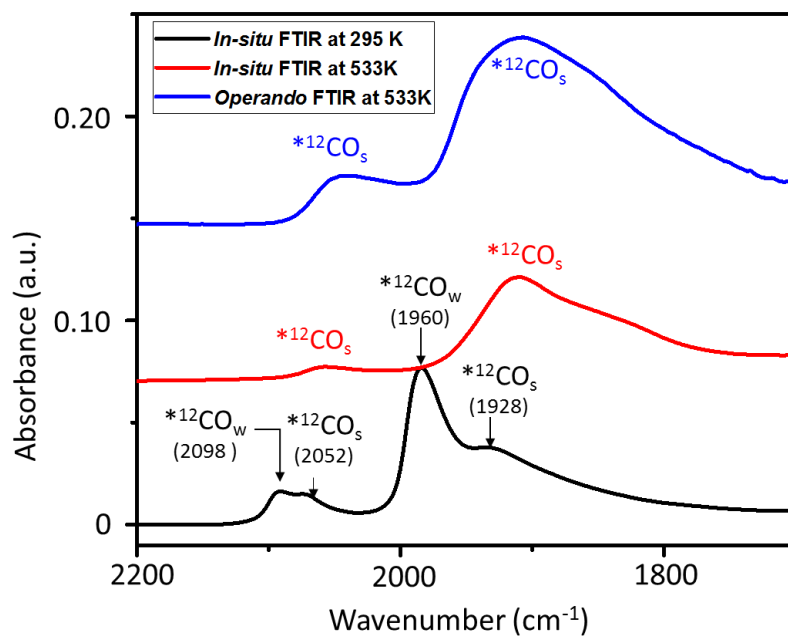

**Supplementary Figure 1.** In-situ FTIR spectra of CO adsorption on 5% Pd/Al<sub>2</sub>O<sub>3</sub> at 295 K (Black), and then heated up to 533 K (Red), and *operando* FTIR spectrum (Blue) of 5% Pd/Al<sub>2</sub>O<sub>3</sub> collected at 533 K in CO<sub>2</sub>+H<sub>2</sub> reaction condition.

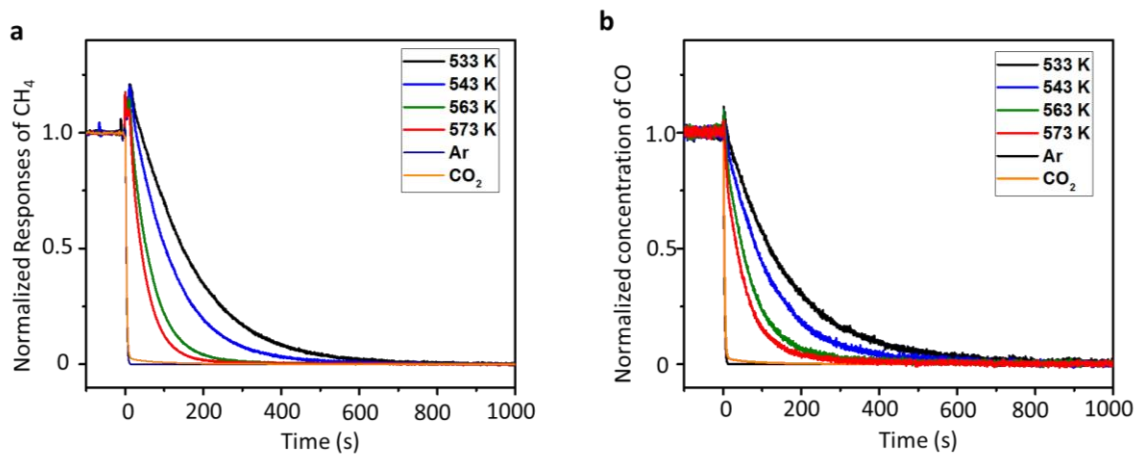

**Supplementary Figure 2.** Normalized MS signals of CH<sub>4</sub> (a) and CO (b) obtained at the exit of the *operando*-FTIR cell as a function of time at 533-573 K when the feed gas was switched at 0 s from CO<sub>2</sub>+H<sub>2</sub> to <sup>13</sup>CO<sub>2</sub>+H<sub>2</sub> over 5% Pd/Al<sub>2</sub>O<sub>3</sub>.

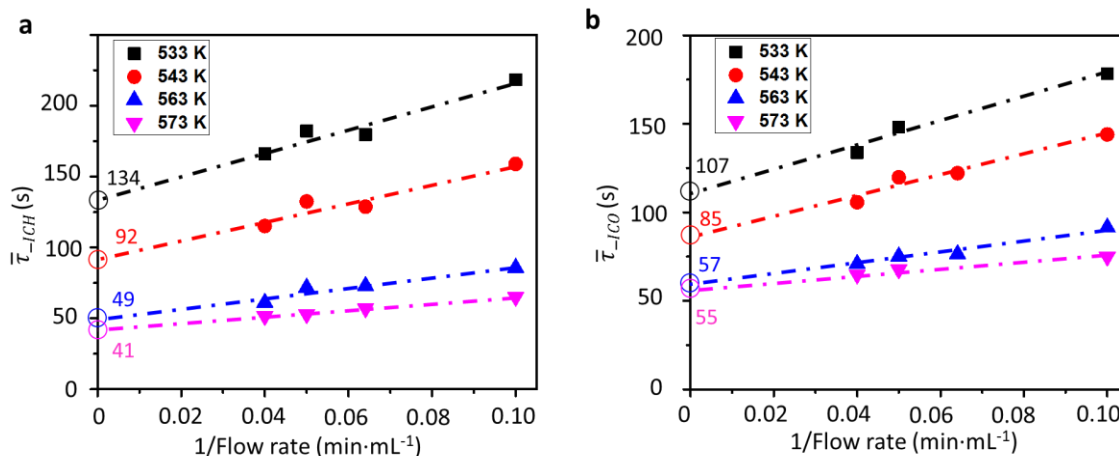

**Supplementary Figure 3.** Real mean surface residence times ( $\bar{\tau}_0$ ) of ICH (a) and ICO (b) at 533-573 K obtained by extrapolating the mean surface residence times ( $\bar{\tau}$ ) at different contact times of 0.04, 0.05, 0.67 and 0.1 min·mL<sup>-1</sup>(by varying space velocity) to zero contact time. The mean surface residence time ( $\bar{\tau}$ ) is yielded by integration of the normalized step-decay response of adsorbed surface intermediate leading to CH<sub>4</sub> and CO (Fig. S2) after the feed gas was switched at 0 s from CO<sub>2</sub>+H<sub>2</sub> to <sup>13</sup>CO<sub>2</sub>+H<sub>2</sub> over 5% Pd/Al<sub>2</sub>O<sub>3</sub>.

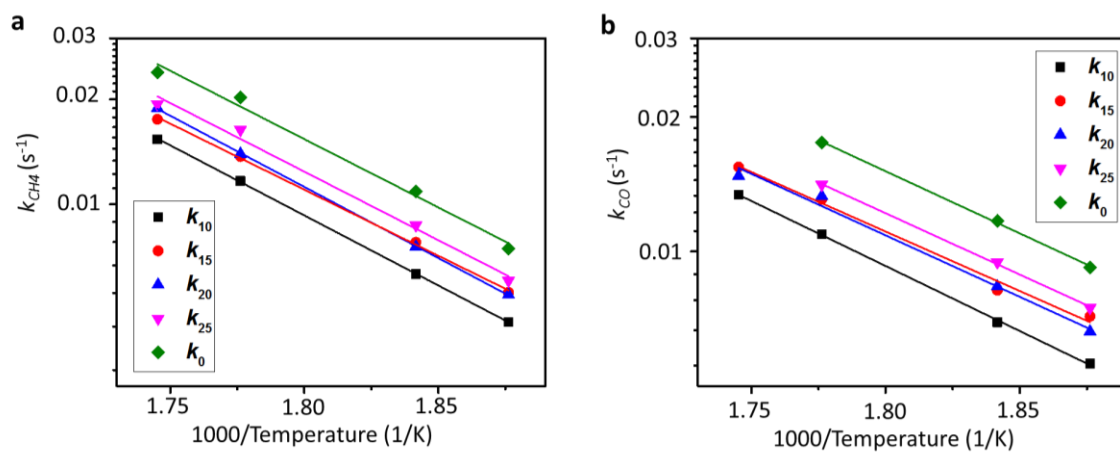

**Supplementary Figure 4.** Arrhenius plots for  $^{12}\text{CH}_4$  (a) and  $^{12}\text{CO}$  (b) formation at different contact times of 0 ( $k_0$ ), 0.04 ( $k_{25}$ ), 0.05 ( $k_{20}$ ), 0.67 ( $k_{15}$ ), 0.1 ( $k_{10}$ )  $\text{min}\cdot\text{mL}^{-1}$ . The activation energies obtained from the plots are listed below in **Supplementary Table 1**.

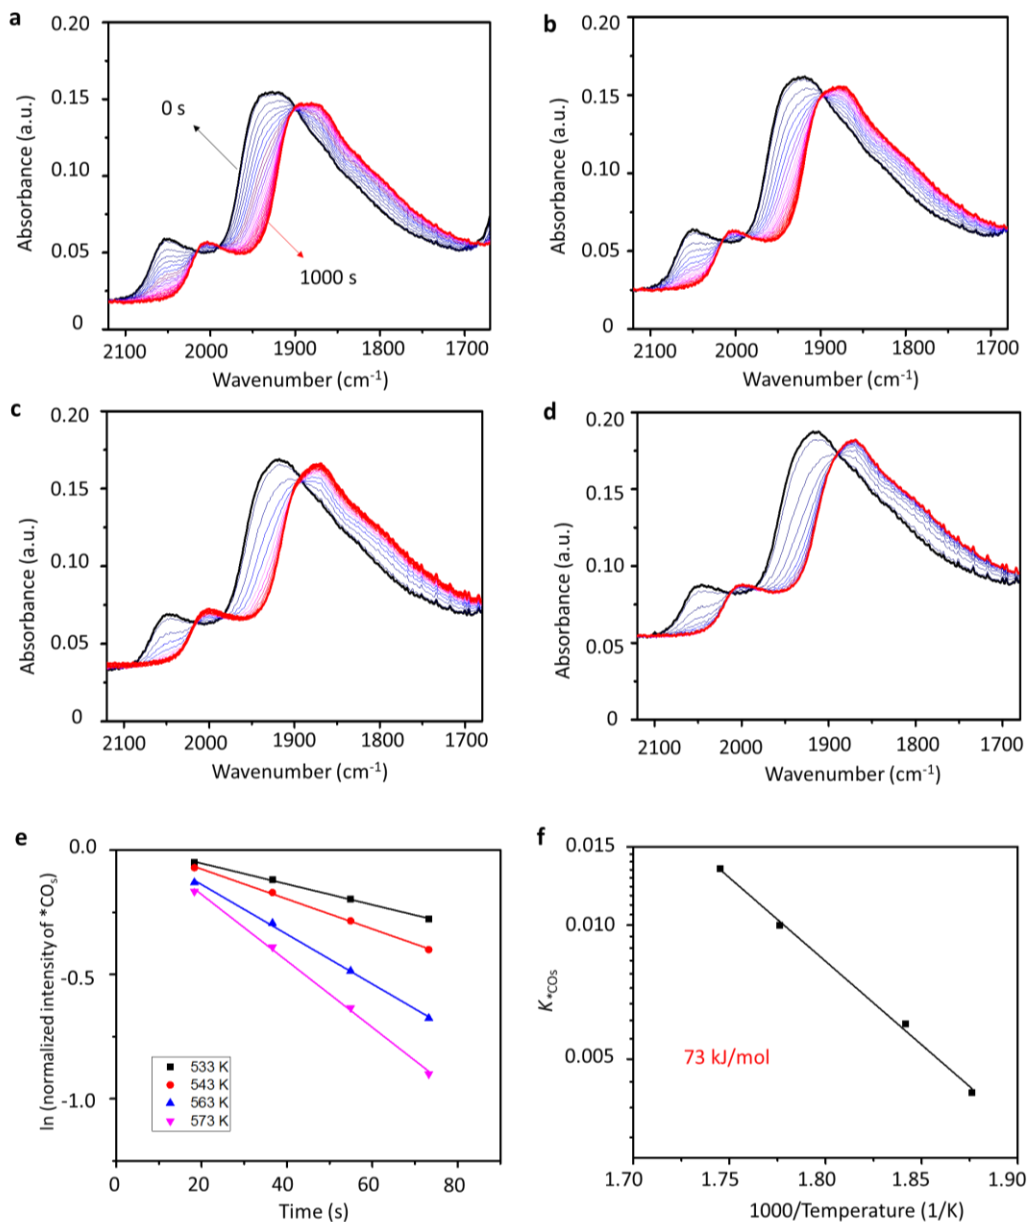

**Supplementary Figure 5.** Shift in peak positions of adsorbed  $^{12}\text{CO}_s$  to  $^{13}\text{CO}_s$  during *operando*-FTIR measurements on 5% Pd/Al<sub>2</sub>O<sub>3</sub> at (a) 533, (b) 543, (c) 563 and (d) 573 K after the feed gas was switched at 0 s from  $^{12}\text{CO}_2/\text{H}_2$  to  $^{13}\text{CO}_2/\text{H}_2$ . (e) The rate constants of adsorbed  $^{12}\text{CO}_s$  conversion at 533-573 K obtained by plotting the logarithm of the integrated band intensities (after peak deconvolution) versus time. (f) The activation energy for the conversion of  $^{12}\text{CO}_s$  obtained by fitting of reaction rates for the conversion of adsorbed  $^{12}\text{CO}_s$  from (e).

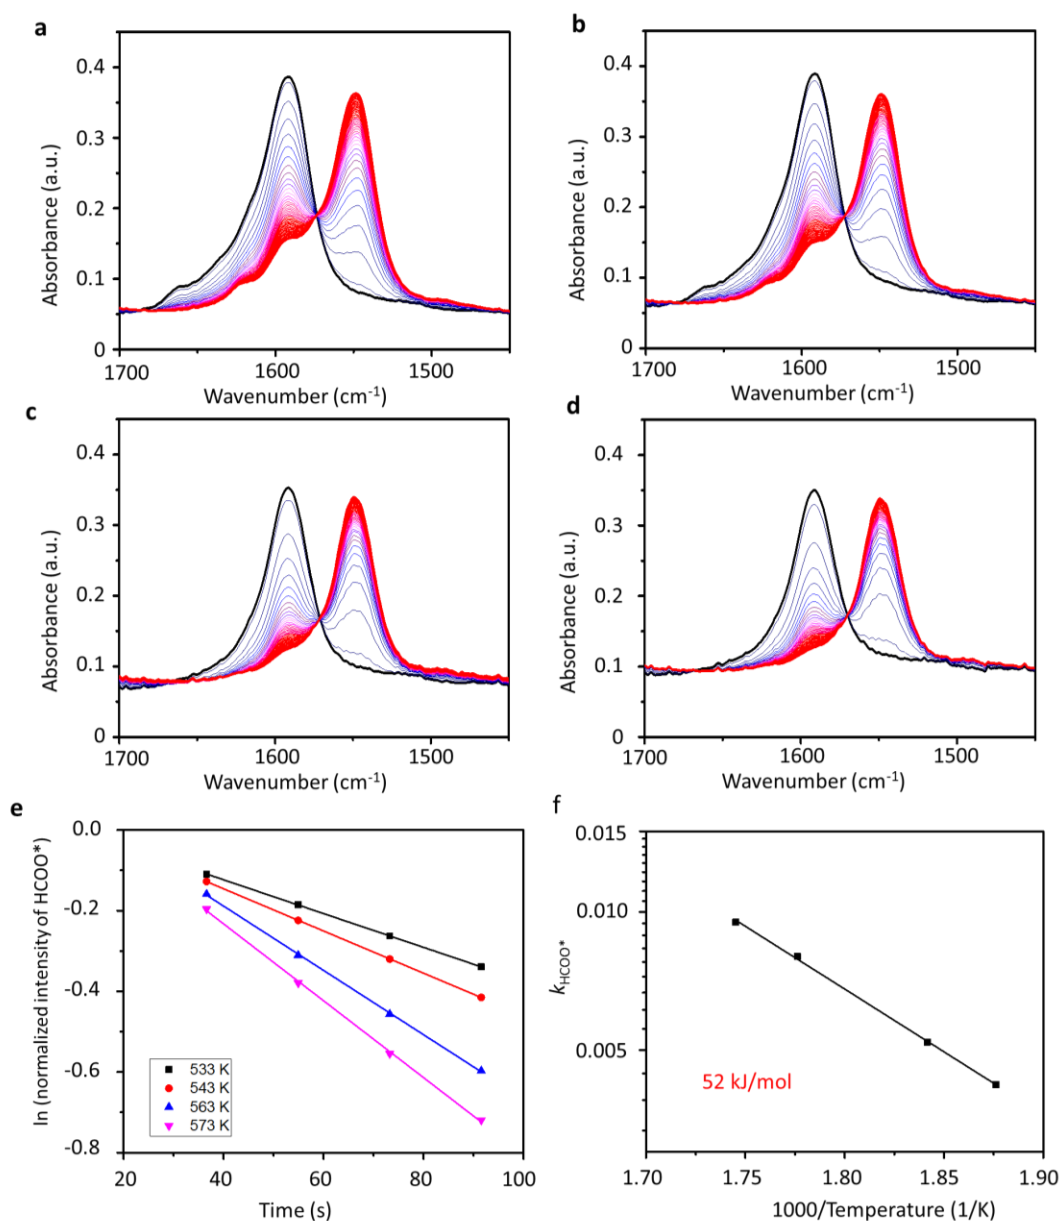

**Supplementary Figure 6.** Shift in peak positions of adsorbed  $\text{H}^{12}\text{COO}^*$  to  $\text{H}^{13}\text{COO}^*$  during *operando*-FTIR measurements on 5% Pd/ $\text{Al}_2\text{O}_3$  at (a) 533, (b) 543, (c) 563 and (d) 573 K after the feed gas was switched at 0 s from  $^{12}\text{CO}_2/\text{H}_2$  to  $^{13}\text{CO}_2+\text{H}_2$ . (e) The rate constants of adsorbed  $\text{H}^{12}\text{COO}^*$  conversion at 533-573 K obtained by plotting the logarithm of the integrated band intensities (after peak deconvolution) versus time. (f) The activation energy for the conversion of  $\text{H}^{12}\text{COO}^*$  obtained by fitting of reaction rates for the conversion of adsorbed  $\text{H}^{12}\text{COO}^*$  from (e).

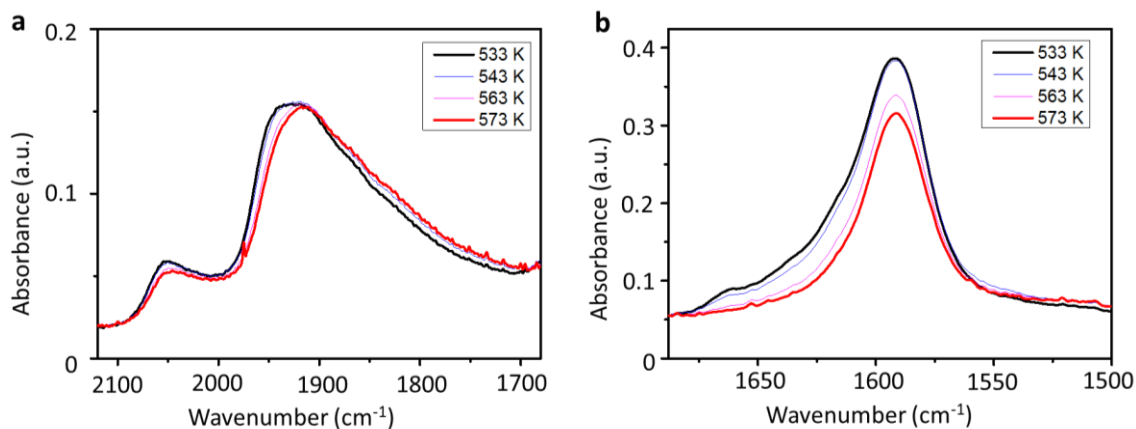

**Supplementary Figure 7.** *Operando*-FTIR spectra for adsorbed (a) <sup>12</sup>CO and (b) H<sup>12</sup>COO\* on 5% Pd/Al<sub>2</sub>O<sub>3</sub> at 533, 543, 563 and 573 K obtained under steady state reaction conditions. (The size of the circle in Fig. 2 qualitatively corresponds to the amount of surface formates, deduced from the IR intensities in (b))



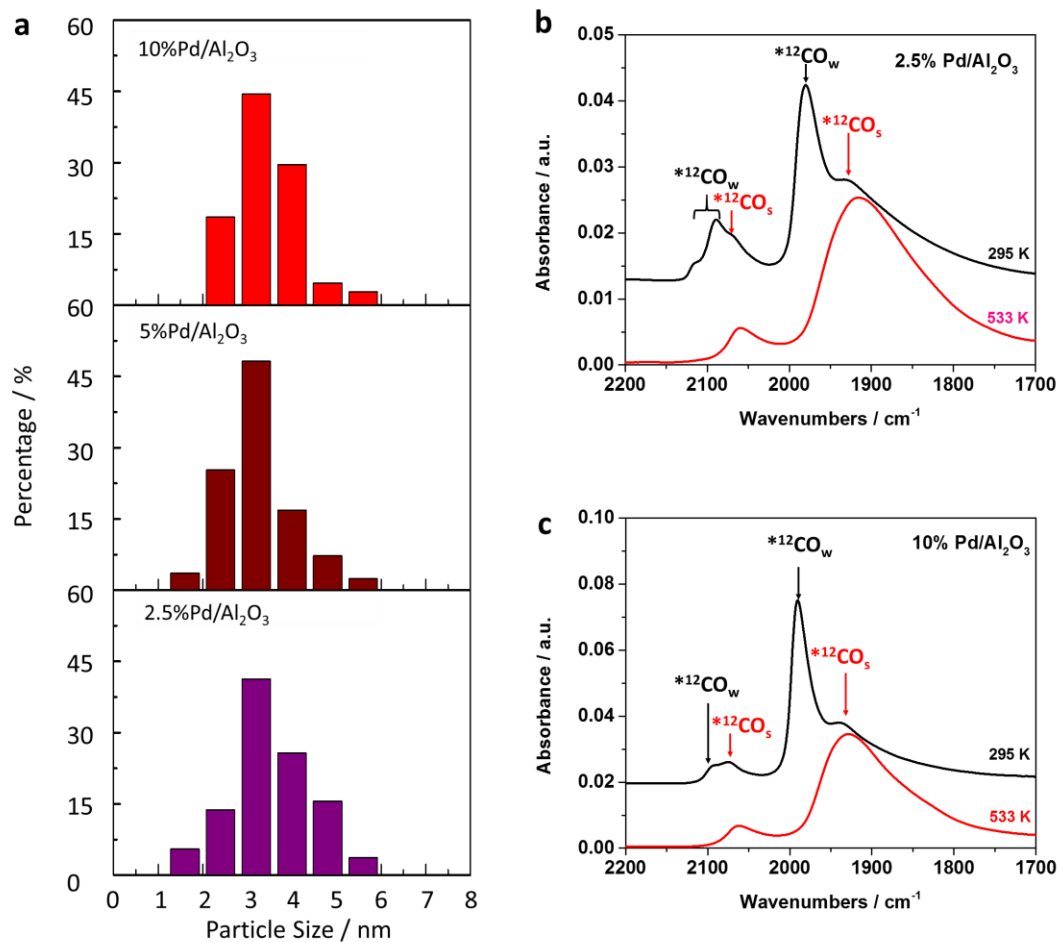

**Supplementary Figure 8.** (a) Pd particle size distribution analyzed from TEM images of 10% Pd/Al<sub>2</sub>O<sub>3</sub>, 5% Pd/Al<sub>2</sub>O<sub>3</sub> and 2.5% Pd/Al<sub>2</sub>O<sub>3</sub> (minimum number of particles analyzed in each histogram is 500). (b) In-situ FTIR spectra of CO adsorption on (b) 2.5% Pd/Al<sub>2</sub>O<sub>3</sub> and (c) 10% Pd/Al<sub>2</sub>O<sub>3</sub> at 295 K (Black), and then heated up to 533 K (Red).

**Supplementary Table.** The activation energies obtained from the plots in Supplementary Fig. 4.

|                                 | <b>Contact time (min/mL)</b>     |                                   |                                   |                                   |                             |
|---------------------------------|----------------------------------|-----------------------------------|-----------------------------------|-----------------------------------|-----------------------------|
|                                 | <b>0.1 (<math>k_{10}</math>)</b> | <b>0.67 (<math>k_{15}</math>)</b> | <b>0.05 (<math>k_{20}</math>)</b> | <b>0.04 (<math>k_{25}</math>)</b> | <b>0 (<math>k_0</math>)</b> |
| <b>E<sub>CH4</sub> (kJ/mol)</b> | 77                               | 72                                | 78                                | 75                                | 75                          |
| <b>E<sub>CO</sub> (kJ/mol)</b>  | 56                               | 51                                | 53                                | 53                                | 53                          |
